# Supplementary material
Source: PubMed Central journal article supplement (PMC2744580)
Supplement: NIHMS105610-supplement-Supplementary_Data.pdf [file NIHMS105610-supplement-Supplementary_Data.pdf]

**Supplementary data**

**Table 1:** The list of reaction kinetics for all nodes in the dynamic integrated model linking protein aggregation and proteasomal degradation of substrate proteins and its inhibition, mitochondrial dysfunction and GSH synthesis/metabolism.

| <b>1) Protein aggregation and proteasomal degradation</b> |                            |                      |                                                                                                                                                       |              |
|-----------------------------------------------------------|----------------------------|----------------------|-------------------------------------------------------------------------------------------------------------------------------------------------------|--------------|
| <b>(a) Protein aggregation and Lewy body formation</b>    |                            |                      |                                                                                                                                                       |              |
| NODE                                                      | Equation                   | Parameters (units)   | Mechanism and assumption                                                                                                                              | Reference(s) |
| Seed formation (control $\alpha$ -syn)                    | syn_control --> seeds      | Kf = 1.2E-6 (1/sec)  | Irreversible mass action.<br>Here during aggregation of a-syn a condition is given that aggregation will occur when concentration of A-Syn $\leq$ 8uM | [3,7]        |
| Seed formation (WT $\alpha$ -syn)                         | syn_WT --> seeds           | Kf = 4.4E-2 (1/sec)  | Irreversible mass action.                                                                                                                             | [1,2,4]      |
| Seed formation (A53T $\alpha$ -syn)                       | syn_A53T --> Seeds         | Kf = 8.79E-2 (1/sec) | Irreversible mass action.<br>Assumed as the kinetics of Mutant A-syn aggregation is 2 fold higher than WT.                                            | [1,2,4]      |
| Seeds oligomerization                                     | Seeds --> Oligomers        | Kf = 3.9E-6 (1/sec)  | Irreversible mass action.                                                                                                                             | [3,7]        |
| Protofibril formation (oligomer polymerization)           | Oligomers --> Protofibrils | Kf = 9.5E-7 (1/sec)  | Irreversible mass action.                                                                                                                             | [3,7]        |
| syn-agg Formation (Protofibril oligomerization)           | Protofibrils --> synagg    | Kf = 1E-4 (1/sec)    | Irreversible mass action.                                                                                                                             | [3,7]        |

|                                                                                                 |                                                                                                       |                                                                                                                                                                                                                                                                                                                              |                                                                                                                                                                                                                                                                                                                                              |            |
|-------------------------------------------------------------------------------------------------|-------------------------------------------------------------------------------------------------------|------------------------------------------------------------------------------------------------------------------------------------------------------------------------------------------------------------------------------------------------------------------------------------------------------------------------------|----------------------------------------------------------------------------------------------------------------------------------------------------------------------------------------------------------------------------------------------------------------------------------------------------------------------------------------------|------------|
| Lewy body formation (syn-agg polymerization)                                                    | syn-agg --> Lewy body                                                                                 | $K_f = 8.35E-6$ (1/sec)                                                                                                                                                                                                                                                                                                      | Irreversible mass action.                                                                                                                                                                                                                                                                                                                    | [3,7]      |
| <b>(b) Proteasomal degradation and its inhibition by aggregates or exogenous inhibitor (PI)</b> |                                                                                                       |                                                                                                                                                                                                                                                                                                                              |                                                                                                                                                                                                                                                                                                                                              |            |
| Protein Degradation                                                                             | Proteins ( $\alpha$ -syn/ synphilin / Pael-R) --> Sink                                                | $K_{catf\_proteasome} = 0.5$ ( $\mu\text{mol}/\text{sec}$ )<br>$K_m\_protein = 5\mu\text{M}$<br>$K_i\_toxic\ aggregates = 0.001\ \mu\text{M}$<br>$K_i\_PI = 1\mu\text{M}$                                                                                                                                                    | Michaelis menten kinetics.<br>1. Sink is shown for the degradation of protein<br>2. Toxic aggregates (which comprise intermediates of aggregation namely, oligomers, protofibrils, synagg and their dopamine adducts ) are shown to inhibit the proteasomal degradation.<br>3. Proteasoamal activity is modeled as michelis-menten kinetics. | [8,9]      |
| <b>2) Mitochondrial Bioenergetics and Dysfunction</b>                                           |                                                                                                       |                                                                                                                                                                                                                                                                                                                              |                                                                                                                                                                                                                                                                                                                                              |            |
| Electron transport chain-NADH oxidation                                                         | (a) $CI + NADH \rightarrow CIbnd + NAD$<br>(b) $3Hplus + UQ + CIbnd \rightarrow 3 Hplus + Uqbnd + CI$ | (a) $K_m\_CI = 0.3\ \mu\text{M}$ ,<br>$K_m\_NADH = 300\ \mu\text{M}$ ,<br>$V_f = 7.5E-2$ ( $\mu\text{m}/\text{sec}$ )<br>(b) $V_f = 8.5\ E-2$ ( $\mu\text{m}/\text{sec}$ ),<br>$K_m\_CIbnd = 0.15\ \mu\text{M}$ ,<br>$K_m\_UQ = 1.5\ E-1$<br>$K_i\_Toxic\_Aggregate = 3.33E-6\ \mu\text{M}$<br>$K_i\_PN = 7E-3\ \mu\text{M}$ | Coupled reactions. Both reactions are modified Michelis-Menten equations.                                                                                                                                                                                                                                                                    | [10-18]    |
| ROS production coupled with CI oxidation                                                        | $CIbnd + O_2Mt \rightarrow CI + ROSmt$                                                                | $K_f = 5E-5$<br>((Liter/ $\mu\text{M}$ )*(1/sec))                                                                                                                                                                                                                                                                            | Irreversible mass action activated by ROS. This                                                                                                                                                                                                                                                                                              | [12,21-24] |

|                                                                                                                                                                                                   |                                                                                                                  |                                                                                                                                 |                                                                                                                                                                                                                            |               |
|---------------------------------------------------------------------------------------------------------------------------------------------------------------------------------------------------|------------------------------------------------------------------------------------------------------------------|---------------------------------------------------------------------------------------------------------------------------------|----------------------------------------------------------------------------------------------------------------------------------------------------------------------------------------------------------------------------|---------------|
|                                                                                                                                                                                                   |                                                                                                                  | $K_{act\_ROS\_C1} = 0.1 \mu M$                                                                                                  | reaction remains coupled with CI reduction. Mitochondria produces SO and primary ROS at two complexes I and III .CI and CIII produces SO on the matrix side of membrane.                                                   |               |
| CIII reduction coupled with UQ oxidation.                                                                                                                                                         | $UQ_{bnd} + CIII \rightarrow UQ + CIII_{bnd}$                                                                    | $V_f = 0.1 (\mu m/sec),$<br>$K_m_{UQ_{bnd}} = 0.15 (\mu M),$<br>$K_m_{C3} = 0.15 (\mu M)$                                       | Modified Michaelis-Menten reaction.                                                                                                                                                                                        | [13-16,19,20] |
| CIII oxidation coupled with ROS production.                                                                                                                                                       | $C3_{bnd} + O2_{Mt} \rightarrow CIII + ROS_{mt}$                                                                 | $K_f = 5E-5$<br>$((Liter/\mu M)*(1/sec))$<br>$K_{act\_ROS\_C3} = 0.1 \mu M$                                                     | Irreversible mass action activated by ROS. This reaction remains coupled with CIII reduction. Mitochondria produces SO and primary ROS at two complexes I and III .CI and CIII produces SO on the matrix side of membrane. | [12,21-24]    |
| UQ oxidation coupled with cytochrome C (CYC <i>S</i> <sub>i</sub> ) reduction (During the process of electron flow, each complexes catalyzes the translocation of protons across inner membrane). | $CIII_{bnd} + 3$<br>$Mt_{matrix.Hplus_i} + CYC_{S_i}$<br>$\rightarrow CYC_{S_{bnd}} + 3$<br>$IMS.Hplus_o + CIII$ | $V_f = 0.1 (\mu m/sec),$<br>$K_m_{CIII_{bnd}} = 0.15 (\mu M)$<br>$K_m_{CYC_{S_i}} = 0.15 (\mu M)$<br>$K_i_{PN} = 0.007 (\mu M)$ | Modified Michaelis-Menten reaction. During the process of electron flow, each complex catalyzes the translocation of protons across IM.                                                                                    | [13-16,20]    |

|                                                                               |                                                                                                 |                                                                                                               |                                                                                                                                         |               |
|-------------------------------------------------------------------------------|-------------------------------------------------------------------------------------------------|---------------------------------------------------------------------------------------------------------------|-----------------------------------------------------------------------------------------------------------------------------------------|---------------|
| CIV reduction coupled with cytochrome C Oxidation                             | CYCSbnd + CIV --> CYCSi + CIVbnd                                                                | Vf = 0.1 (μm/sec),<br>Km_CYCSbnd = 0.15 (μM)<br>Km_C4 = 0.15 (μM)                                             | Modified Michaelis-Menten reaction. During the process of electron flow, each complex catalyzes the translocation of protons across IM. | [13-16,20}    |
| CIV oxidation coupled with ROS production                                     | O <sub>2</sub> Mt + CIVbnd --> CIV + ROSmt                                                      | Kf= 5E-5<br>((Liter/μM)*(1/sec))<br>Kact_ROS_C3 = 0.1 μM                                                      | Irreversible mass action.                                                                                                               | [12,21-24]    |
| H <sub>2</sub> O Formation coupled with CIV oxidation.                        | CIVbnd + 5 Mtmatrix.Hplusi + Mtmatrix.O2Mt --> CIV + 3 IMS.Hpluso + Mtmatrix.H <sub>2</sub> Omt | Vf = 1.25 E-1 (μmol/sec),<br>Km_CIVbnd = 0.15 μM,<br>Ki_NO = 20 μM<br>Ki_PN = 0.007 μm.                       | Modified Michaelis-Menten.                                                                                                              | [13-16,20}    |
| <b>(3) GSH Biosynthesis and metabolism (including GCL mRNA transcription)</b> |                                                                                                 |                                                                                                               |                                                                                                                                         |               |
| Glutathione synthesis<br>Step 1- mediated by γ-GCL                            | Glut + Cys + ATPcyto --> GluCys + ADPcyto + Pi                                                  | Kcatf_GCL = 7.344 1/sec<br>Km_Glut = 3600 μM,<br>Km_Cys = 100 μM,<br>Km_ATPcyto = 400 μM,<br>Ki_GSH = 500 μM. | Modified Michaelis-Menten kinetics with product inhibition by GSH.                                                                      | [28-32]       |
| Glutathione synthesis<br>Step 2- mediated by GS (glutathione synthetase)      | GluCys + Gly + ATPcyto -> Pi + ADPcyto + GSH                                                    | Kcatf_GS = 4.9 E-1,<br>Km_ATPcyto = 4.5 μM,<br>Km_Gly = 2000 μM.                                              | This is modeled as modified Michaelis-Menten reaction.                                                                                  | [29,30,33,34] |

|                                                                             |                                                                                                                                                          |                                                                                                                |                                                                                                      |                                                    |
|-----------------------------------------------------------------------------|----------------------------------------------------------------------------------------------------------------------------------------------------------|----------------------------------------------------------------------------------------------------------------|------------------------------------------------------------------------------------------------------|----------------------------------------------------|
| GPx – Glutathione Peroxidase                                                | $\text{H}_2\text{O}_2 + \text{GSH} \rightarrow \text{H}_2\text{O} + \text{GSSG}$                                                                         | Kcatf_GPx = 21 (1/sec),<br>Km_GSH= 3000 $\mu\text{M}$ ,<br>Km_H <sub>2</sub> O <sub>2</sub> = 10 $\mu\text{M}$ | This reaction is modeled as two substrate Michaelis-Menten mechanism                                 | Values from Brenda and optimized [EC no. 1.11.1.9] |
| GR – Glutathione Reductase                                                  | $\text{GSSG} + \text{NADPH} \rightarrow \text{GSH} + \text{NADP}$                                                                                        | Kcatf_GR = 100 1/sec,<br>Km_NADPH = 85 $\mu\text{M}$ ,<br>Km_GSSG = 65 $\mu\text{M}$ .                         | This reaction is modeled as two substrate Michaelis-Menten mechanism                                 | Values from Brenda and optimized [EC no. 1.8.1.7]  |
| S-Nitroso-glutathione formation                                             | (a) $\text{GSH} + \text{ONOO} \rightarrow \text{GSNO}$<br>(b) $\text{GSHc} + \text{N}_2\text{O}_3 \rightarrow \text{GSNOc} + \text{Hplus} + \text{NO}_2$ | (a) Kf = 3 E-4 (1/sec)<br>(b) Kf = 1E-5 (1/sec)                                                                | Irreversible mass action.                                                                            | [35,36]                                            |
| <b>GCL upregulation</b>                                                     |                                                                                                                                                          |                                                                                                                |                                                                                                      |                                                    |
| Keap1_Nrf2 complex dissociation                                             | $\text{Keap1\_Nrf2} \rightarrow \text{Keap1} + \text{Nrf2c}$                                                                                             | Vf = 0.01 1/sec,<br>km_Keap1_Nrf2 = 50 $\mu\text{M}$<br>Ka = 2 E-6 uM                                          | Modified Michaelis Menten which is activated by ROS/electrophile stress                              | [38- 44]                                           |
| Nrf2 translocation                                                          | $\text{Nrf2c} \rightarrow \text{Nrf2n}$                                                                                                                  | Kf = 1.0E-5 (1/sec)                                                                                            | Irreversible mass action.                                                                            | [38-40]                                            |
| EpRE complex formation                                                      | $\text{Nrf2n} + \text{JUNn} + \text{EpRE} \rightarrow \text{EpRE\_Nrf2\_JunD}$                                                                           | Kf = .01 $\mu\text{M}$<br>Kr = .008 $\mu\text{M}$                                                              | The binding of Nrf2 in nucleus to form EpRE complex is modeled with reversible mass action kinetics. | [38-40]                                            |
| Transcription of $\gamma$ - GCL gene induced by EpRE Transcription factor . | $\text{DNA} \rightarrow \text{GCL mRNA}$                                                                                                                 | Km_EpRE_Nrf2_JunD = 19 $\mu\text{M}$<br>Vf = 0.0082 $\mu\text{mol/sec}$                                        | This reaction is modeled as modified Michaelis-Menten mechanism.                                     | [38-40]                                            |

|                                                                    |                           |                                                                                                        |                                                                  |           |
|--------------------------------------------------------------------|---------------------------|--------------------------------------------------------------------------------------------------------|------------------------------------------------------------------|-----------|
| Phosphorylation of Jun by JNK in the FosJun complex formation      | FOSpn_JUNn --> FOSpnJUNpn | Kcatf_JNK = 25 (1/sec),<br>Km_FosPn_JunN = 10<br>μM                                                    | This reaction is modeled as modified Michaelis-Menten mechanism. | [37-40]   |
| Transcription of γ- GCL gene induced by AP1 Transcription factor.  | DNA --> GCL mRNA          | V max = 0.004 μmol/sec<br>Km_FOSpn_JUNn = 19<br>μM                                                     | This reaction is modeled as Michaelis-Menten mechanism.          | [41-43]   |
| Translation of GCL enzyme                                          | GCLmRNAc --> GCL          | Kf = 3.5E-2 (1/sec)                                                                                    | The reaction is modeled with mass action kinetics.               | [41-43]   |
| Inhibition of proteasomal degradation of Nrf2 by toxic Aggregates. | Nrf2c --> Sink            | Kcatf_proteasome = 0.01<br>(1/sec)<br>Km_Nrf2c = μm<br>Ki_Toxic aggregate = 1E-5<br>μM<br>Ki_PI = 1 μM | This reaction is modeled as Modified Michaelis-Menten.           | [8,40-45] |

**List of abbreviations:**

CI – NADH Oxidoreductase (Complex I of Electron Transport Chain)  
CIbnd – Electron bound CI  
CIII – Cytochrome c Oxidase (Complex III of Electron Transport Chain)  
CIIIbnd- Electron bound CIII  
CIV- Cytochrome c Reductase (Complex IV of Electron Transport Chain)  
CIVbnd- Electron bound CIV  
UQ – Ubiquinone  
Cytc – Cytochrome c  
UQbnd - Electron bound Ubiquinone  
cytcband - Electron bound Cytochrome c  
ATP – Adenosine triphosphate  
ADP – Adenosine diphosphate  
Pi – Inorganic phosphate  
NADP – Nicotinamide adenosine diphosphate  
Arg – Arginine  
Cit- Citrulline  
NO -Nitric oxide  
O<sub>2</sub> – Oxygen  
ROS – Superoxide  
H<sub>2</sub>O<sub>2</sub> – Hydrogen peroxide  
PN – Peroxynitrite  
NO<sub>2</sub> – Nitrogen dioxide radical  
DOPAL – Metabolite of dopamine  
GSH – Glutathione  
GSSG – Glutathione disulphide  
GR – Glutathione reductase  
GPx – Glutathione peroxidase  
SOD – Super oxide dismutase  
MAO– Monoamine oxidase  
XO– Xanthine oxidase

NOS – Nitric oxide synthase  
Gly – Glycine  
GluCys -GlutamylCysteine  
Cys – Cysteine  
Glu – Glutamate  
GSNO – S- Nitrosoglutathione  
NO<sub>2</sub>R – Nitrogen Dioxide radicals  
N<sub>2</sub>O<sub>2</sub>- Anhydrous nitrous acid  
ONOOH - Peroxynitrous acid  
Hplusi – Proton concentration in mitochondrial matrix  
Hpluso - Proton concentration in mitochondrial membrane space.  
FOSpn\_JUNn – With Phosphorylated FOS in AP 1 complex.  
FOSpnJUNpn – Activated AP1  
DNA – Deoxyribonucleic acid.  
GCL mRNA – mRNA for GCL  
γ-GCL – Gamma glutamylcysteine ligase  
Nrf2c – Component of EpRE transcription factor in the cytosol.  
Keap1 -A cytoskeleton binding protein  
Keap1\_Nrf2 - Inactive Nrf2 bound with Keap1  
Nrf2n -Component of EpRE transcription factor in the nucleus.  
JUNn - Nuclear JUN protein  
EpRE - Electrophile Response Element or ARE  
EpRE\_Nrf2\_JunD -Electrophile Response Element or ARE bound with JunD and Nrf2 to form an active Transcription factor  
AP1- Activator Protein 1 - Activator protein 1 complex

**Parameters:**

Kf = Forward rate constant  
Kcat = Catalytic rate constant  
V max = The maximum rate of reaction  
Km = Michaelis Menten constant  
Ka = Activation constant  
Ki = Inhibition constant



## References:

1. El-Agnaf, O.M.A.; Jakes, R.; Curran, M.D.; Wallace, A. Effects of the mutations Ala30 to Pro and Ala53 to Thr on the physical and morphological properties of alpha-synuclein protein implicated in Parkinson's disease. *FEBS Lett.* **440**: 67–70; 1998.
2. El-Agnaf, O.M.A.; Jakes, R.; Curran, M.D.; Middleton, D.; Ingentto, R.; Bianchi, E.; Pessi, A.; Neill, D.; Wallace, A. Aggregates from mutant and wild-type alpha-synuclein proteins and NAC peptide induce apoptotic cell death in human neuroblastoma cells by formation of beta-sheet and amyloid-like filaments. *FEBS Lett.* **440**: 71–75; 1998.
3. Giasson, B.I.; Murray, I.V.; Trojanowski, J.Q.; Lee, V.M. A hydrophobic stretch of 12 amino acid residues in the middle of alpha-synuclein is essential for filament assembly. *J. Biol. Chem.* **276**: 2380–2386; 2001.
4. Conway, K.A.; Lee, S.J.; Rochet, J.C.; Ding, T.T.; Williamson, R.E.; Lansbury, P.T. Jr. (2000). Acceleration of oligomerization, not fibrillization, is a shared property of both alpha-synuclein mutations linked to early-onset Parkinson's disease: implications for pathogenesis and therapy. *Proc. Natl Acad. Sci. U SA.* **97**: 571–576; 2000.

5. Lim, K.L.; Dawson, V.L.; Dawson, T.M. Parkin-mediated lysine 63-linked polyubiquitination: a link to protein inclusions formation in Parkinson's and other conformational diseases? *Neurobiol. Aging* **27**: 524-529; 2006.
6. Lim, K.L.; Chew, K.C.; Tan, J.M.; Wang, C.; Chung, K.K.; Zhang, Y.; Tanaka, Y.; Smith, W.; Engelender, S.; Ross, C.A.; Dawson, V.L.; Dawson, T.M. Parkin mediates nonclassical, proteasomal-independent ubiquitination of synphilin-1: implications for Lewy body formation. *J. Neurosci.* **25**: 2002-2009; 2005.
7. Raichur, A.; Vali, S.; Gorin, F. Dynamic modeling of alpha-synuclein aggregation for the sporadic and genetic forms of Parkinson's disease. *Neuroscience* **142**:859-870; 2006.
8. Lindersson, E.; Beedholm, R.; Højrup, P.; Moos, T.; Gai, W.; Hendil, K.B.; Jensen, P.H. Proteasomal inhibition by alpha-synuclein filaments and oligomers. *J. Biol. Chem.* **279**: 12924-12934; 2004.
9. Snyder, H.; Mensah, K.; Theisler, C.; Lee, J.; Matouschek, A.; Wolozin, B. Aggregated and monomeric alpha-synuclein bind to the S6' proteasomal protein and inhibit proteasomal function. *J. Biol. Chem.* **278**: 11753-11759; 2003.

10. Watabe, M.; Nakaki, T. ATP depletion does not account for apoptosis induced by inhibition of mitochondrial electron transport chain in human dopaminergic cells. *Neuropharmacology* **52**:536-541; 2007.

[11] Tretter, L.; Adam-Vizi, V. Alpha-ketoglutarate dehydrogenase: a target and generator of oxidative stress. *Philos. Trans. R. Soc. Lond. B. Biol. Sci.* **360**:2335-2345; 2005.

[12] Tretter, L.; Adam-Vizi, V. Moderate Dependence of ROS Formation on DeltaPsi<sub>m</sub> in Isolated Brain Mitochondria Supported by NADH-linked Substrates. *Neurochem. Res.* **32**:569-575; 2007.

[13] Kadenbach, B. Intrinsic and extrinsic uncoupling of oxidative phosphorylation. *Biochim. Biophys. Acta.* **1604**:77-94; 2003.

[14] Jin, Q.; Bethke, C.M. Kinetics of electron transfer through the respiratory chain. *Biophys. J.* **83**:1797-1808; 2002.

[15] Schultz, B.E.; Chan, S.I. Structures and proton-pumping strategies of mitochondrial respiratory enzymes. *Annu. Rev. Biophys. Biomol. Struct.* **30**:23-65; 2001.

- [16] Beard, D.A. A biophysical model of the mitochondrial respiratory system and oxidative phosphorylation. *PLoS Comput. Biol.* **1**:252-264; 2005.
- [17] Kushnareva, Y.; Murphy, A.N.; Andreyev, A. Complex I-mediated reactive oxygen species generation: modulation by cytochrome c and NAD(P)<sup>+</sup> oxidation-reduction state. *Biochem. J.* **368**: 545-553; 2002.
- [18] Hill, T.L. Steady-state kinetic formalism applied to multienzyme complexes, oxidative phosphorylation, and interacting enzymes. *Proc. Natl. Acad. Sci. USA.* **73**:4432-4436; 1976.
- [19] Zu, Y.; Di Bernardo, S.; Yagi, T.; Hirst, J. Redox properties of the [2Fe-2S] center in the 24 kDa (NQO2) subunit of NADH:ubiquinone oxidoreductase (complex I). *Biochemistry* **41**:10056-10069; 2002.
- [20] Nicholls, D.G. Mitochondrial membrane potential and aging. *Aging Cell* **3**:35-40; 2004.
- [21] Sipos, I.; Tretter, L.; Adam-Vizi, V. Quantitative relationship between inhibition of respiratory complexes and formation of reactive oxygen species in isolated nerve terminals. *J. Neurochem.* **84**:112-118; 2003.

[22] Turrens, J.F. Mitochondrial formation of reactive oxygen species. *J. Physiol.* **552**:335-344; 2003.

[23] Saybasili, H.; Yuksel, M.; Haklar, G.; Yalcin, A.S. Effect of mitochondrial electron transport chain inhibitors on superoxide radical generation in rat hippocampal and striatal slices. *Antioxid. Redox. Signal.* **3**:1099-1104; 2001  
Cadenas, E.; Davies, K.J. Mitochondrial free radical generation, oxidative stress, and aging. *Free Radic. Biol. Med.* **29**:222-230; 2000.

[24] Han, D.; Antunes, F.; Canali, R.; Rettori, D.; Cadenas, E. Voltage-dependent anion channels control the release of the superoxide anion from mitochondria to cytosol. *J. Biol. Chem.* **278**:5557-5563; 2003.

[25] Kaim, G.; Dimroth, P. ATP synthesis by F-type ATP synthase is obligatorily dependent on the transmembrane voltage. *EMBO J.* **18**:4118-4127; 1999.

[26] Purdon, A.D.; Rapoport, S.I. Energy requirements for two aspects of phospholipid metabolism in mammalian brain. *Biochem. J.* **335**: 313-318; 1998.

- [27] Bernstein, B.W.; Bamberg, J.R. Actin-ATP hydrolysis is a major energy drain for neurons. *J. Neurosci.* **23**:1-6; 2003.
- [28] Huang, J.; Philbert, M.A. Distribution of glutathione and glutathione-related enzyme systems in mitochondria and cytosol of cultured cerebellar astrocytes and granule cells. *Brain Res.* **680**:16-22; 1995.
- [29] Huang, J.; Philbert, M.A. Cellular responses of cultured cerebellar astrocytes to ethacrynic acid-induced perturbation of subcellular glutathione homeostasis. *Brain Res.* **711**:184-192; 1996.
- [30] Jez, J.M.; Cahoon, R.E.; Chen, S. Arabidopsis thaliana glutamate-cysteine ligase: functional properties, kinetic mechanism, and regulation of activity. *J. Biol. Chem.* **279**:33463-33470; 2004.
- [31] Nakayama, Y.; Kinoshita, A.; Tomita, M. Dynamic simulation of red blood cell metabolism and its application to the analysis of a pathological condition. *Theor. Biol. Med. Model.* **2**:18-29; 2005.
- [32] Dringen, R. Metabolism and functions of glutathione in brain. *Prog. Neurobiol.* **62**:649-671; 2000.

- [33] Njalsson, R.; Norgren, S.; Larsson, A.; Huang, C.S.; Anderson, M.E.; Luo, J.L. Cooperative binding of gamma-glutamyl substrate to human glutathione synthetase. *Biochem. Biophys. Res. Commun.* **289**:80-84, 2001.
- [34] Jez, J.M.; Cahoon, R.E. Kinetic mechanism of glutathione synthetase from *Arabidopsis thaliana*. *J. Biol. Chem.* **279**:42726-42731; 2004.
- [35] Clementi, E.; Brown, G.C.; Feelisch, M.; Moncada, S. Persistent inhibition of cell respiration by nitric oxide: crucial role of S-nitrosation of mitochondrial complex I and protective action of glutathione. *Proc. Natl. Acad. Sci. USA* **95**:7631–7636; 1998.
- [36] Schild, L.; Reinheckel, T.; Reiser, M.; Horn, T.F.; Wolf, G.; Augustin, W. Nitric oxide produced in rat liver mitochondria causes oxidative stress and impairment of respiration after transient hypoxia. *FASEB J.* **17**:2194-2201; 2003.
- [37] Mythri, R.B.; Jagatha, B.; Pradhan, N.; Andersen, J.; Bharath, M.M. Mitochondrial Complex I Inhibition in Parkinson's Disease: How Can Curcumin Protect Mitochondria? *Antioxid. Redox. Signal.* **9**:399-408; 2007.

[38] Dickinson, D.A.; Iles, K.E.; Zhang, H.; Blank, V.; Forman, H.J. Curcumin alters EpRE and AP-1 binding complexes and elevates glutamate-cysteine ligase gene expression. *FASEB J.* **17**:473-475; 2003.

[39] Zhu, Y.G.; Chen, X.C.; Chen, Z.Z.; Zeng, Y.Q.; Shi, G.B.; Su, Y.H.; Peng, X. Curcumin protects mitochondria from oxidative damage and attenuates apoptosis in cortical neurons. *Acta. Pharmacol. Sin.* **25**:1606-1612; 2004.

[40] Dickinson, D.A.; Levonen, A.L.; Moellering, D.R.; Arnold, E.K.; Zhang, H.; Darley-Usmar, V.M.; Forman, H.J. Human glutamate cysteine ligase gene regulation through the electrophile response element. *Free Radic. Biol. Med.* **37**: 1152-1159; 2004.

[41] Zhang, D.D. Mechanistic studies of the Nrf2-Keap1 signaling pathway. *Drug Metab. Rev.* **38**: 769-789; 2006.

[42] Kobayashi, A.; Kang, M.I.; Watai, Y.; Tong, K.I.; Shibata, T.; Uchida, K.; Yamamoto, M. Oxidative and electrophilic stresses activate Nrf2 through inhibition of ubiquitination activity of Keap1. *Mol. Cell Biol.* **26**:221-229; 2006.



[43] Lee, J.M.; Shih, A.Y.; Murphy, T.H.; Johnson, J.A. NF-E2-related factor-2 mediates neuroprotection against mitochondrial complex I inhibitors and increased concentrations of intracellular calcium in primary cortical neurons. *J. Biol. Chem.* **278**: 37948-37956; 2003.

[44] D'Autréaux, B.; Toledano, M.B. ROS as signalling molecules: mechanisms that generate specificity in ROS homeostasis. *Nat. Rev. Mol. Cell Biol.* **8**: 813-824; 2007.

[45] Sekhar, K.R.; Yan, X.X.; Freeman, M.L. Nrf2 degradation by the ubiquitin proteasome pathway is inhibited by KIAA0132, the human homolog to INrf2. *Oncogene* **21**: 6829-6834; 2002.
